# Supplementary material
Source: HighWire-hosted journal article supplement (https://www.cmajopen.ca/highwire/filestream/90445/field_highwire_adjunct_files/1/open-2022-0230-1-at.pdf)
Supplement: open-2022-0230-1-at.pdf [file open-2022-0230-1-at.pdf]

## APPENDIX 1 – Supplementary Material

**Supplementary Table S1. Cancer definitions using ICD-O-3**

| Cancer type                                                                      | ICD-O-3 code                                                     |
|----------------------------------------------------------------------------------|------------------------------------------------------------------|
| All cancers                                                                      | C00.0–C80.9                                                      |
| Anus <sup>2,5</sup>                                                              | C21                                                              |
| Bladder                                                                          | C67                                                              |
| Brain                                                                            | C70-C72                                                          |
| Breast                                                                           | C50                                                              |
| Cervix <sup>1,5</sup>                                                            | C53                                                              |
| Colorectal                                                                       | C18–C20, C26.0                                                   |
| Esophagus                                                                        | C15                                                              |
| Hodgkin lymphoma <sup>3,4</sup>                                                  | Histologies 9650-9667                                            |
| Kaposi sarcoma <sup>1,3</sup>                                                    | Histology 91403                                                  |
| Kidney                                                                           | C64 - C65                                                        |
| Larynx <sup>8</sup>                                                              | C32                                                              |
| Leukemia                                                                         | C42                                                              |
| Liver <sup>2,6</sup>                                                             | C22                                                              |
| Lung                                                                             | C34                                                              |
| Malignant neoplasm of other and unspecified male genital organs <sup>2,5,9</sup> | C63                                                              |
| Melanoma of the skin                                                             | C44 with histologies 8720–8790                                   |
| Multiple myeloma                                                                 | Histologies 9731–9732, 9734                                      |
| Nasopharynx <sup>2,4</sup>                                                       | C11                                                              |
| Non-Hodgkin lymphoma <sup>1, 4</sup>                                             | Histologies 9590–9597, 967-972, 9735, 9737, 9738                 |
| Oral cavity & pharynx <sup>2,5</sup>                                             | C00–C00.9, C01.9-C02.9, C03-C11, C12.9, C13, C14.0, C14.2, C14.8 |
| Ovary                                                                            | C56.9                                                            |
| Pancreas                                                                         | C25                                                              |
| Penis <sup>2,5</sup>                                                             | C60                                                              |
| Prostate                                                                         | C61.9                                                            |
| Stomach <sup>2,7</sup>                                                           | C16                                                              |
| Testis                                                                           | C62                                                              |
| Thyroid                                                                          | C73.9                                                            |
| Uterus                                                                           | C54-C55                                                          |
| Vagina <sup>2,5</sup>                                                            | C52                                                              |
| Vulva <sup>2,5</sup>                                                             | C51                                                              |

ICD-O-3=International Classification of Disease for Oncology, Third Edition ICD-10=International Statistical Classification of Diseases and Related Health Problems, Tenth Version 2016. All cancer types exclude basal cell and squamous cell skin cancers. Classification of infection-related cancer groupings was based on the IARC monograph volume 100B, and then selected those sites where IARC deemed there was sufficient epidemiological evidence in humans. (IARC Monograph Volume 100B. Biological Agents. 2012; Bouvard et al. Lancet Oncology. 2009)

Acronyms: HBV/HCV – hepatitis B and C viruses; HPV – human papillomavirus; EBV – Epstein-Barr virus; HHV-8 – human herpesvirus-8

<sup>1</sup>AIDS-defining cancers. Cervical cancer was not included in the infection-related NADC classification as it is part of the ADC classification.

<sup>2</sup>Infection-related non-AIDS defining cancers

<sup>3</sup>HHV-8-associated cancer

<sup>4</sup>EBV-associated cancer

<sup>5</sup>HPV-associated cancers

<sup>6</sup>HBV/HCV-associated cancer

<sup>7</sup>H. Pylori-associated cancer

<sup>8</sup>The IARC Working Group considered that the epidemiological evidence was inconclusive to confirm the role of HPV in cancer of the larynx (IARC Monograph Volume 100B. Biological Agents. 2012)

<sup>9</sup>Considered part of HPV-related anogenital classification

**Supplementary Table S2. Site-specific incident cancers diagnosed among people with and without HIV in Ontario, Canada, 1996-2020**

| Specific cancer site, n (%)                                        | Cancers diagnosed among people with HIV | Cancers diagnosed among people without HIV | Total      |
|--------------------------------------------------------------------|-----------------------------------------|--------------------------------------------|------------|
| Any cancer                                                         | 1534 (100)                              | 903 (100)                                  | 2437 (100) |
| Non-Hodgkin lymphoma <sup>3</sup>                                  | 305 (19.9)                              | 37 (4.1)                                   | 342 (14.0) |
| Kaposi sarcoma <sup>3</sup>                                        | 235-241                                 | <6                                         | 241 (9.9)  |
| Lung                                                               | 121 (7.9)                               | 98 (10.8)                                  | 219 (9.0)  |
| Prostate                                                           | 116 (7.6)                               | 186 (20.6)                                 | 302 (12.4) |
| Anus <sup>3</sup>                                                  | 106-112                                 | <6                                         | 112 (4.6)  |
| Colorectal                                                         | 80 (5.2)                                | 106 (11.7)                                 | 186 (7.6)  |
| Liver <sup>3</sup>                                                 | 49 (3.2)                                | 19 (2.1)                                   | 68 (2.8)   |
| Hematopoietic and reticuloendothelial System (Leukemia)            | 49 (3.2)                                | 46 (5.1)                                   | 95 (3.9)   |
| Oral cavity and pharynx <sup>3</sup>                               | 49 (3.2)                                | 20 (2.2)                                   | 69 (2.8)   |
| Hodgkin lymphoma <sup>3</sup>                                      | 46-52                                   | <6                                         | 52 (2.1)   |
| Breast                                                             | 45 (2.9)                                | 47 (5.2)                                   | 92 (3.8)   |
| Melanoma of the skin                                               | 38 (2.5)                                | 45 (5.0)                                   | 83 (3.4)   |
| Kidney and renal pelvis                                            | 36 (2.3)                                | 36 (4.0)                                   | 72 (2.9)   |
| Thyroid                                                            | 33 (2.2)                                | 53 (5.9)                                   | 86 (3.5)   |
| Male genitalia (penis <sup>3</sup> , testis)                       | 19 (1.2)                                | 12 (1.3)                                   | 31 (1.3)   |
| Stomach <sup>3</sup>                                               | 18 (1.2)                                | 23 (2.5)                                   | 41 (1.7)   |
| Cervix <sup>3</sup>                                                | 15-21                                   | <6                                         | 21 (0.9)   |
| Brain/Central Nervous System                                       | 17 (1.1)                                | 20 (2.2)                                   | 37 (1.5)   |
| Female upper genital tract (corpus uteri, uterus, ovary, placenta) | 17 (1.1)                                | 14 (1.5)                                   | 31 (1.3)   |
| Multiple myeloma                                                   | 17 (1.1)                                | 17 (1.9)                                   | 34 (1.4)   |
| Bladder                                                            | 16 (1.0)                                | 21 (2.3)                                   | 37 (1.5)   |
| Pancreas                                                           | 15 (1.0)                                | 18 (2.0)                                   | 33 (1.3)   |
| Esophagus                                                          | 13 (0.8)                                | 9 (1.0)                                    | 22 (0.9)   |
| Other connective and soft tissue <sup>1</sup>                      | 10 (0.7)                                | 8 (0.9)                                    | 18 (0.7)   |
| Female lower genital tract (vulva, vagina) <sup>3</sup>            | 7-13                                    | <6                                         | 13 (0.5)   |
| Biliary tract                                                      | 9 (0.6)                                 | 8 (0.9)                                    | 17 (0.7)   |
| Larynx                                                             | 9 (0.6)                                 | 8 (0.9)                                    | 17 (0.7)   |
| Lymph nodes                                                        | 3-9                                     | <6                                         | 9 (0.4)    |
| All other cancer sites <sup>2</sup>                                | 16-33                                   | 22-40                                      | 55 (2.3)   |

<sup>1</sup> Includes blood vessel, bursa, cartilage, fascia, fat, ligament except uterine, lymphatic vessel, muscle, synovia, tendon (sheath). Excludes cartilage (of): articular (C40-C41), larynx (C32.3), nose (C30.0), connective tissue of

breast (C50.-), Kaposi sarcoma (C46.-), mesothelioma (C45.-), peripheral nerves and autonomic nervous system (C47.-), peritoneum (C48.-), retroperitoneum (C48.0)

<sup>2</sup>All other sites include: larynx (C32.-), other and unspecified parts of biliary tract (C24.-), other malignant neoplasms of skin (C44.-), lymph nodes (C77.-), nasal cavity and middle ear (C30.-), urethra (C68.-), retroperitoneum and peritoneum (C48.-), small intestine (C17.-), gallbladder (C23.-), heart (C38.-), adrenal gland (C74.-).

<sup>3</sup>Indicates cancers that have a known infectious cause

Note: Ranges are shown to suppress a small cell count (less than 6)

**Supplementary Table S3. Cumulative incidence risk (%) by age 75 for people with and without HIV by calendar period, Ontario, Canada, 1996–2020**

| Cancer group                                                 | Cumulative risk, % (95% CI) |                  |                  |                     |                  |                  |
|--------------------------------------------------------------|-----------------------------|------------------|------------------|---------------------|------------------|------------------|
|                                                              | Calendar periods            |                  |                  | Calendar periods    |                  |                  |
|                                                              | 1996–2003                   | 2004–2011        | 2012–2020        | 1996–2003           | 2004–2011        | 2012–2020        |
|                                                              | People with HIV             |                  |                  | People without HIV  |                  |                  |
| All cancers                                                  | 34.1 (28.9-39.2)            | 35.5 (31.5-39.5) | 28.0 (25.2-30.7) | 32.8 (20.0-45.6)    | 28.8 (23.9-33.7) | 26.4 (24.0-28.9) |
| Infection-unrelated cancer                                   | 18.7 (12.9-24.4)            | 19.4 (15.5-23.3) | 18.6 (16.3-20.8) | 28.4 (15.7-41.2)    | 26.5 (21.6-31.4) | 23.2 (20.8-25.5) |
| Infection-related cancer                                     | 20.8 (16.7-24.9)            | 21.1 (17.5-24.6) | 12.1 (9.8-14.4)  | 6.1 (0.0-12.8)      | 3.1 (1.4-4.9)    | 4.3 (3.1-5.6)    |
| ADC                                                          | 14.8 (11.9-17.7)            | 14.3 (11.1-17.5) | 7.2 (5.1-9.4)    | 6.1 (0.0-12.8)      | 0.8 (0.0-1.6)    | 1.8 (1.0-2.7)    |
| Infection-related NADC                                       | 7.4 (3.5-11.3)              | 8.1 (5.7-10.6)   | 5.3 (4.3-6.3)    | 0.0 (0.0-0.0)       | 2.3 (0.7-3.9)    | 2.6 (1.6-3.5)    |
| <i>Most common site-specific NADCs among people with HIV</i> |                             |                  |                  |                     |                  |                  |
| Prostate <sup>1</sup>                                        | 6.8 (2.7-10.9)              | 3.4 (1.5-5.2)    | 5.4 (3.9-6.9)    | 9.9 (2.8-17.0)      | 10.3 (6.7-13.9)  | 9.2 (7.2-11.2)   |
| Lung                                                         | 3.0 (0.6-5.5)               | 4.2 (2.4-6.1)    | 3.4 (2.3-4.6)    | 7.1 (0.0-14.7)      | 4.7 (2.0-7.4)    | 3.9 (2.7-5.1)    |
| Colorectal                                                   | 2.1 (0.3-3.9)               | 2.4 (0.8-3.9)    | 2.3 (1.5-3.2)    | 3.3 (0.1-6.4)       | 4.5 (1.9-7.0)    | 2.5 (1.6-3.4)    |
| Anal                                                         | 2.6 (0.7-4.5)               | 2.4 (1.0-3.9)    | 2.2 (1.6-2.9)    | 0.0 (0.0-0.0)       | 0.0 (0.0-0.1)    | 0.2 (0.0-0.4)    |
| Liver                                                        | 1.8 (0.0-3.7)               | 1.6 (0.4-2.8)    | 0.8 (0.4-1.2)    | 0.0 (0.0-0.0)       | 0.5 (0.0-1.6)    | 0.5 (0.1-0.9)    |
|                                                              | Females with HIV            |                  |                  | Females without HIV |                  |                  |
| Infection-unrelated cancer                                   | 17.4 (6.1-28.8)             | 18.4 (11.7-25.2) | 18.0 (13.8-22.2) | 19.8 (14.1-47.4)    | 16.1 (5.8-26.3)  | 19.5 (15.3-23.8) |
| Infection-related cancer                                     | 9.7 (4.9-14.4)              | 8.9 (5.5-12.3)   | 7.3 (4.9-9.6)    | 15.9 (0.0-43.3)     | 1.7 (0.0-4.1)    | 2.5 (0.6-4.5)    |
|                                                              | Males with HIV              |                  |                  | Males without HIV   |                  |                  |
| Infection-unrelated cancer                                   | 14.1 (9.4-18.8)             | 15.8 (11.8-19.8) | 16.3 (11.7-18.6) | 26.9 (15.5-38.3)    | 28.7 (23.1-34.2) | 23.6 (20.8-26.3) |
| Infection-related cancer                                     | 21.6 (17.4-25.9)            | 22.6 (18.1-27.1) | 12.6 (9.9-15.3)  | 4.0 (0.0-9.2)       | 3.2 (1.3-5.1)    | 4.0 (2.8-5.3)    |

<sup>1</sup>Restricted to males

Note: ADC= AIDS-defining cancer, NADC= non-AIDS defining cancer.

**Supplementary Table S4. Hazard ratios and 95% confidence intervals (CI) from cause-specific models for noncancer death, any cancers, infection-related and infection-unrelated cancers comparing people with and without HIV, by age group and calendar period, Ontario, Canada. 1996-2020**

| Outcome                               | Hazard ratios (95% CI)  |                        |                       |                            |
|---------------------------------------|-------------------------|------------------------|-----------------------|----------------------------|
|                                       | Age 18-39 years         | Age 40-59 years        | Age 60-79 years       | Age 80+ years <sup>1</sup> |
| <i>Calendar period (1996-2003)</i>    |                         |                        |                       |                            |
| Death                                 | 11.20<br>(5.42-23.15)*  | 8.47<br>(4.95-14.50)*  | 8.89<br>(2.88-27.42)* | 0.89<br>(0.36-2.16)        |
| Any cancer                            | 15.54<br>(6.76-35.69)*  | 5.31<br>(3.31-8.50)*   | 1.58<br>(0.82-3.04)   | 0.98<br>(0.12-7.79)        |
| Infection-unrelated cancer            | 2.72<br>(0.98-7.53)     | 1.70<br>(0.99-2.93)    | 1.40<br>(0.65-2.98)   | 0.94<br>(0.12-7.54)        |
| Infection-related cancer <sup>1</sup> | -                       | -                      | -                     | -                          |
| <i>Calendar period (2004-2011)</i>    |                         |                        |                       |                            |
| Death                                 | 6.09<br>(3.66-10.15)*   | 4.04<br>(3.16-5.17)*   | 1.87<br>(1.27-2.74)*  | 1.61<br>(0.97-2.69)        |
| Any cancer                            | 5.13<br>(3.29-7.99)*    | 2.57<br>(2.08-3.19)*   | 1.31<br>(0.94-1.81)   | 1.87<br>(0.76-4.61)        |
| Infection-unrelated cancer            | 1.27<br>(0.70-2.29)     | 1.06<br>(0.81-1.39)    | 0.92<br>(0.63-1.33)   | 1.50<br>(0.58-3.84)        |
| Infection-related cancer              | 27.52<br>(10.07-75.15)* | 13.52<br>(8.08-22.63)* | 5.24<br>(2.25-12.23)* | -                          |
| <i>Calendar period (2012-2020)</i>    |                         |                        |                       |                            |
| Death                                 | 5.68<br>(3.55-9.09)*    | 2.76<br>(2.29-3.33)*   | 1.64<br>(1.30-2.07)*  | 1.20<br>(0.85-1.70)        |
| Any cancer                            | 2.69<br>(1.79-4.05)*    | 1.70<br>(1.45-1.99)*   | 1.03<br>(0.85-1.25)   | 1.20<br>(0.66-2.17)        |
| Infection-unrelated                   | 1.09<br>(0.64-1.85)     | 0.96<br>(0.79-1.17)    | 0.87<br>(0.70-1.08)   | 0.98<br>(0.52-1.82)        |
| Infection-related cancer              | 11.14<br>(4.68-26.49)*  | 6.84<br>(4.75-9.84)    | 2.08<br>(1.33-3.25)*  | -                          |

\* Indicates statistical significance with the confidence interval excluding the null value of 1.

<sup>1</sup>Hazard ratios could not be estimated for infection-related cancers in 1996-2003 and for age 80+ across all calendar periods due to small number of events.

Models were stratified by calendar period and adjusted for comorbidity, expected resource utilization and immigration status and included age at follow-up (categorical) and HIV status interaction term.

Appendix 1, as supplied by the authors. Appendix to: Nicolau IA, Moineddin R, Antoniou T, et al. Trends in infection-related and infection-unrelated cancer incidence among people with and without HIV infection in Ontario, Canada, 1996–2020: a population-based matched cohort study using health administrative data. *CMAJ Open* 2023.

DOI:10.9778/cmajo.20220230. Copyright © 2023 The Author(s) or their employer(s). To receive this resource in an accessible format, please contact us at cmajgroup.cmaj.ca.

A)

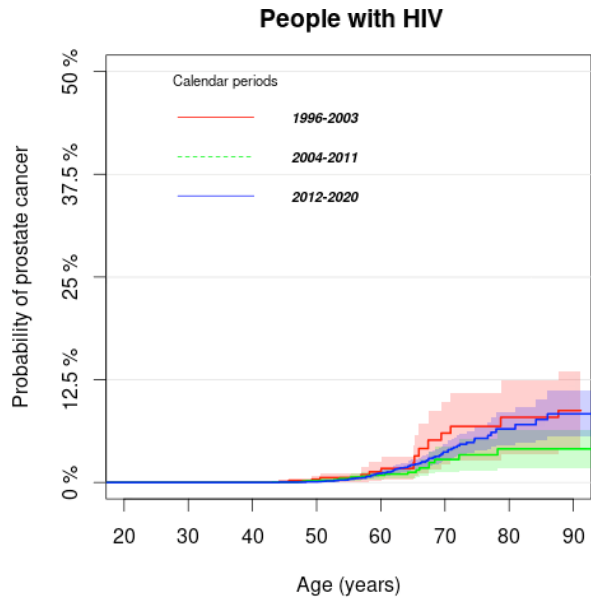

B)

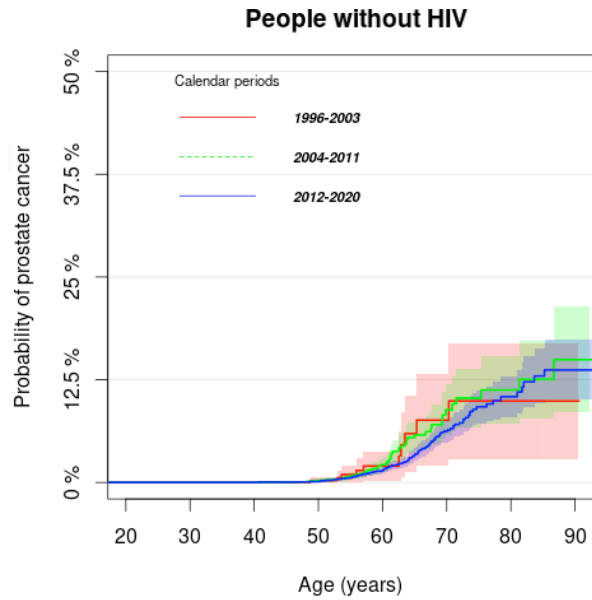

C)

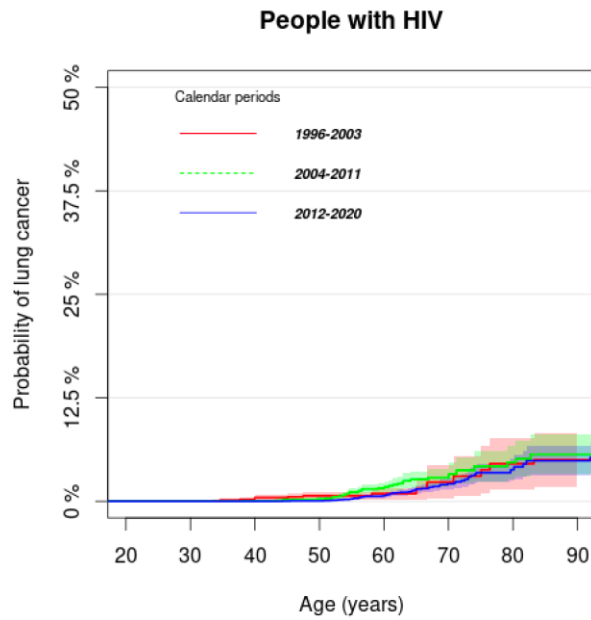

D)

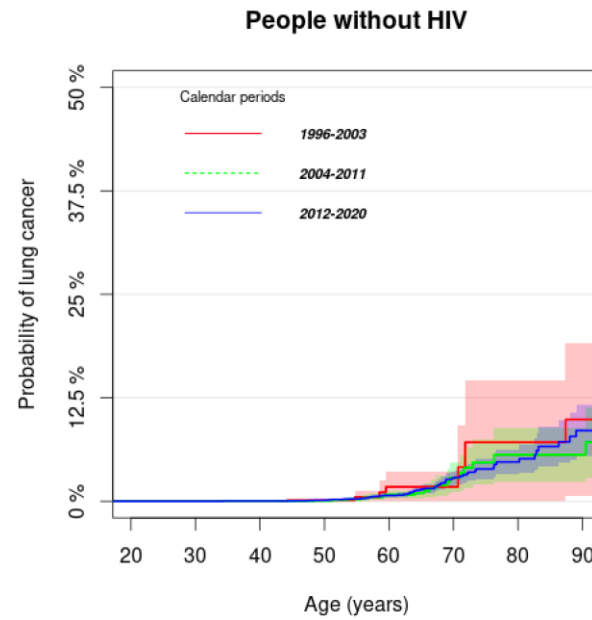

E)

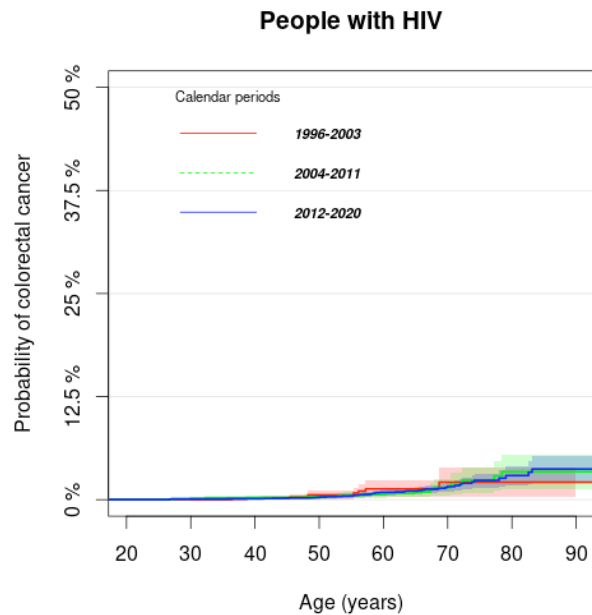

F)

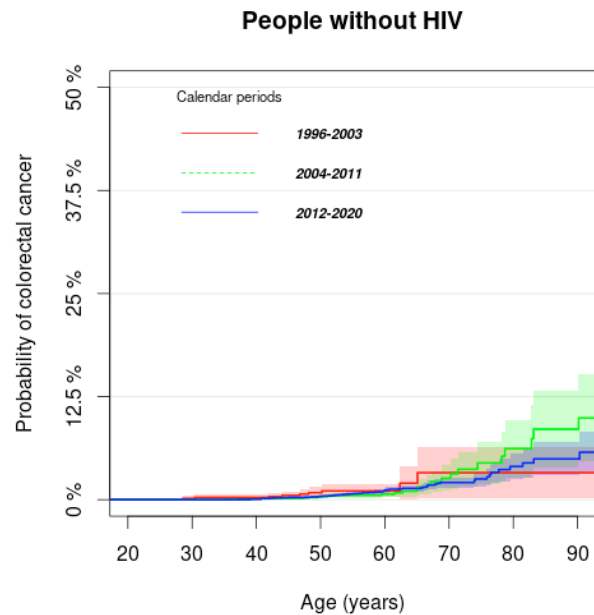

**Supplementary Figure S1. Cumulative incidence of prostate (Panels A and B; restricted to males), lung (Panels C and D) and colorectal cancer (Panels E and F) for people with and without HIV by calendar period with age as the time scale, Ontario, Canada**

A)

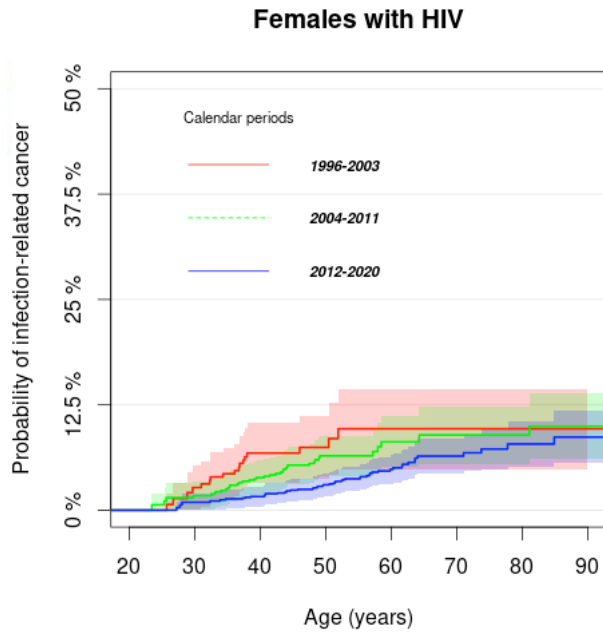

B)

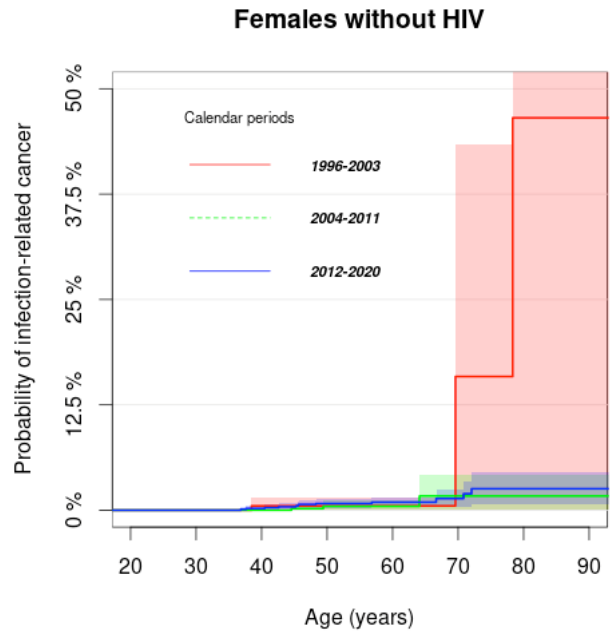

C)

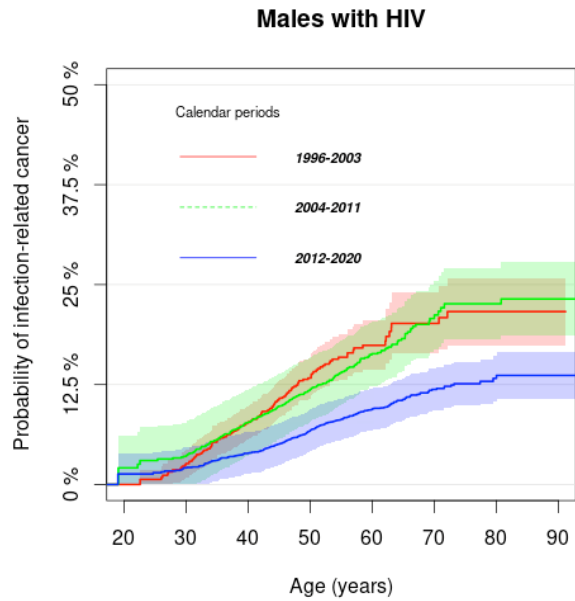

D)

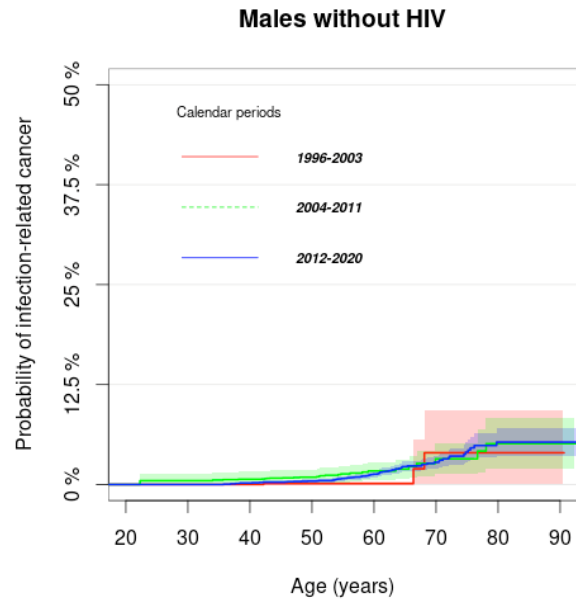



E)

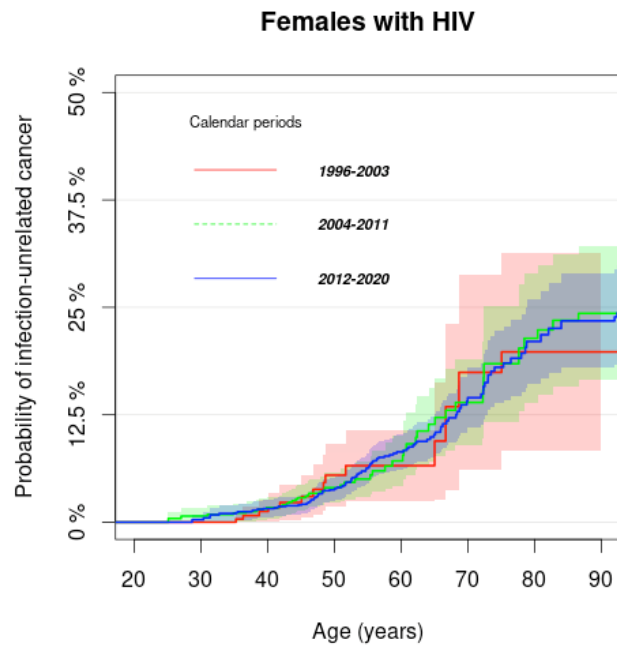

F)

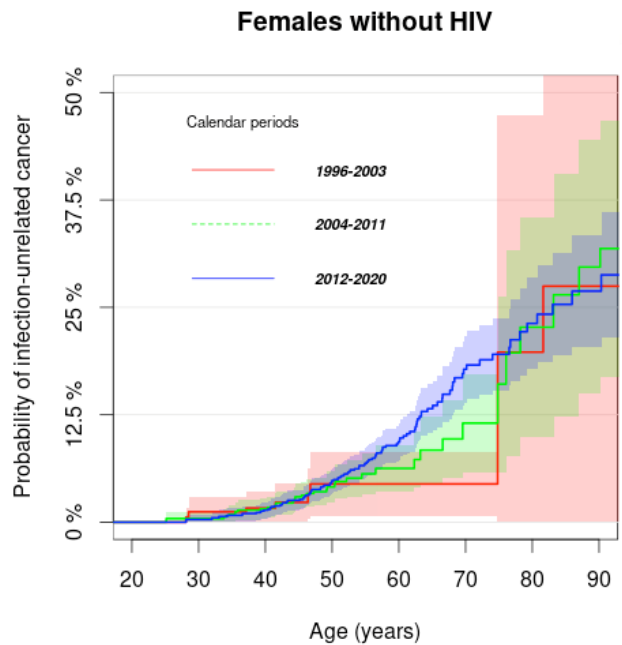

G)

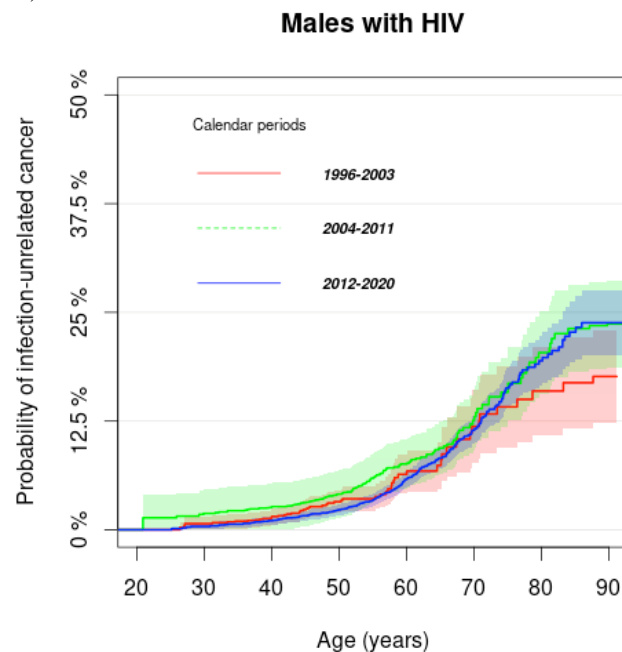

H)

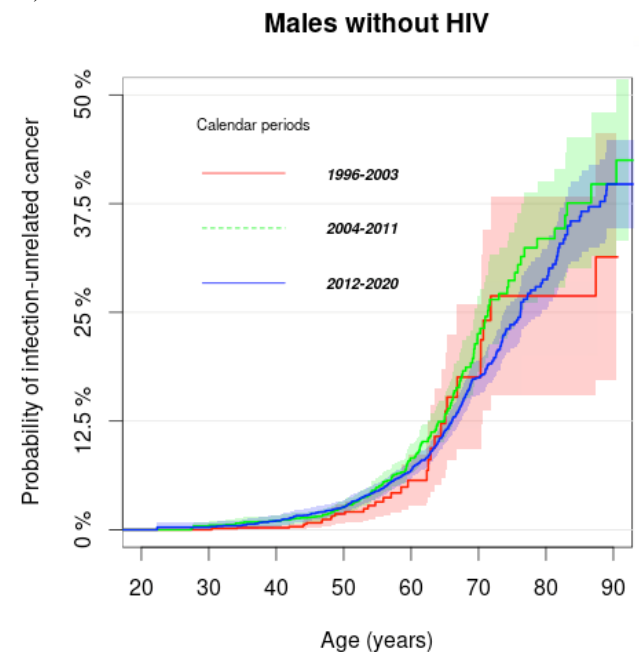

**Supplementary Figure S2. Sex-specific cumulative cancer incidence for infection-related cancers (Panels A-D) and infection-unrelated cancers (Panels E-H) for people with and without HIV by calendar period with age as the time scale, Ontario, Canada**
